# Supplementary material for: A Pilot Analysis of Whole Transcriptome of Human Cryopreserved Sperm
Source: MDPI journal article supplement (doi:10.3390/ijms25074131), 2024-04-08
Supplement: s1 [file s1]

**Table S1.** List of transcripts less abundant in cryopreserved sperm in comparison with non-cryopreserved sperm.

|          |          |          |          |           |
|----------|----------|----------|----------|-----------|
| ABCC3    | ACTL7A   | ACTRT1   | ACTRT2   | AGT       |
| AKAP14   | AKAP4    | AKIRIN1  | ALYREF   | AMY1C     |
| ANKEF1   | ANO1     | ANO2     | ASGR1    | ATL3      |
| BAG1     | BANF2    | BPI      | BRIP1    | C11orf71  |
| C12orf42 | C12orf54 | C16orf78 | C1orf100 | C1QTNF3   |
| C2orf73  | C2orf88  | C9orf24  | CABS1    | CAMP      |
| CAP1     | CAPZA3   | CAPZB    | CAST     | CBY2      |
| CCDC180  | CCDC185  | CCDC54   | CCIN     | CCL15     |
| CDRT4    | CDV3     | CELA3B   | CEP170   | CEP295NL  |
| CHCHD3   | CLMN     | CLPB     | CMSS1    | CNN1      |
| CPNE9    | CST13P   | CST8     | CXorf65  | CYP2R1    |
| DCAF6    | DCC      | DHRS3    | DNAJB8   | DNAL4     |
| DUSP21   | DYNLL2   | DYRK4    | EEF1G    | EEF2KMT   |
| EGFLAM   | ENTR1    | EPB41L2  | ERCC6    | EXOC5     |
| FAM161B  | FAM182B  | FAM20A   | FAM71A   | FAM71B    |
| FAM71C   | FAM71D   | FAM71E1  | FAM81B   | FBXO39    |
| FGL1     | FLJ40194 | FREM1    | GLRX2    | GPI       |
| GSG1     | GTPBP2   | H1-7     | HEMGN    | HENMT1    |
| HERPUD2  | HMGB4    | HMOX2    | HRK      | HSPA1L    |
| IFT172   | IGSF21   | IQCF1    | IQCF2    | IQCG      |
| ITPR3    | IZUMO2   | KCNIP2   | KCNV2    | ITPR3     |
| KIF2B    | KIF5A    | KIZ      | KLHL11   | KLHL7     |
| KRTDAP   | LEMD1    | LGALS13  | LIMK2    | LINC01667 |

|           |            |            |           |          |
|-----------|------------|------------|-----------|----------|
| LOC401176 | LSM2       | LYPLA1     | LYRM1     | LYST     |
| MAP3K19   | MAPRE3     | MARCHF8    | MEA1      | MICAL2   |
| MLF1      | MPP3       | MS4A5      | NCOR1     | NCOR1P1  |
| NELFE     | NF2        | NRDC       | NUP210P1  | OAZ3     |
| ODF2      | PCP2       | PDCL2      | PGRMC2    | PHACTR1  |
| PI3       | PKD2L1     | PLCZ1      | POLR3C    | POPDC3   |
| PRKAR2A   | PROK2      | PRSS37     | PRSS58    | PSMA6    |
| RAB27B    | RFPL3S     | RIBC1      | RNF133    | RO60     |
| ROBO1     | RORA       | RUBCNL     | SAMD4A    | SAXO1    |
| SCP2D1    | SELENOK    | SERGEF     | SERP2     | SERPINB4 |
| SGCA      | SIRPD      | SLC5A1     | SMYD3     | SOX9-AS1 |
| SPATA19   | SPATA32    | SPATA6     | SPATA6L   | SPEM1    |
| SPIN1     | SPIN2B     | SPPL2C     | SPRR2C    | SPRR2D   |
| SPTLC1    | ST6GALNAC2 | STX8       | SYAP1     | SYN3     |
| TBC1D21   | TCF4       | TEX35      | TEX36-AS1 | TBC1D21  |
| TEX55     | TIAM2      | TIMD4      | TLE4      | TMCO5A   |
| TNC       | TNNI3      | TRIM42     | TRIP12    | TSPAN16  |
| TTC39A    | TTLL10     | TTLL2      | TUBA4A    | TUBA8    |
| TUBGCP3   | TXNDC2     | UBE2DNL    | UBL3      | UBQLN3   |
| UCK2      | USE1       | WDR20      | WDR66     | WFDC11   |
| WFDC9     | ZDHHC20    | ZNF295-AS1 | ZNRF3     |          |
