# Supplementary material for: A Pilot Analysis of Whole Transcriptome of Human Cryopreserved Sperm
Source: MDPI journal article supplement (doi:10.3390/ijms25074131), 2024-04-08
Supplement: s1 [file s1]

**Table S5.** Age and semen parameters of the 13 donors enrolled in the study.

| ID  | Age (years) | Volume (ml) | Sperm concentration (10 <sup>6</sup> per ml) | Progressive Motility (%) | Total motility (%) | Round cells (%) |
|-----|-------------|-------------|----------------------------------------------|--------------------------|--------------------|-----------------|
| 1F  | 44          | 4.5         | 72                                           | 60                       | 70                 | 20              |
| 2F  | 34          | 4.0         | 69                                           | 55                       | 60                 | 4               |
| 4F  | 29          | 2.5         | 116                                          | 70                       | 75                 | 5               |
| 9F  | 33          | 3.4         | 22                                           | 35                       | 40                 | 10              |
| 10F | 46          | 1.5         | 27                                           | 40                       | 60                 | 0               |
| 11F | 35          | 5.0         | 126                                          | 55                       | 65                 | 4               |
| 12F | 42          | 3.5         | 137                                          | 60                       | 70                 | 4               |
| 13F | 39          | 2.0         | 83                                           | 50                       | 60                 | 1               |
| 16F | 33          | 3.0         | 16                                           | 60                       | 60                 | 0               |
| 17F | 45          | 4.0         | 71                                           | 55                       | 55                 | 0               |
| 18F | 37          | 2.5         | 47                                           | 57                       | 72                 | 0               |
| 19F | 34          | 1.5         | 23                                           | 55                       | 55                 | 2               |
| 20F | 34          | 3.0         | 19                                           | 55                       | 65                 | 20              |
