# Supplementary material for: A Pilot Analysis of Whole Transcriptome of Human Cryopreserved Sperm
Source: MDPI journal article supplement (doi:10.3390/ijms25074131), 2024-04-08
Supplement: s1 [file s1]

**Table S4.** The most significantly ( $P < 0.05$ ) enriched Gene Ontology Biological Process (BP), cellular components (CC) and molecular function (MF) terms in transcripts increased in cryopreserved sperm respect to non-cryopreserved sperm.

| Category         | Term                                                                                                 | PValue | Genes                                      |
|------------------|------------------------------------------------------------------------------------------------------|--------|--------------------------------------------|
| GOTERM_BP_DIRECT | GO:0019886~antigen processing and presentation of exogenous peptide antigen via MHC class II         | 1,0E-7 | CD74, HLA-DMA, HLA-DRA, HLA-DRB1, HLA-DQB1 |
| GOTERM_BP_DIRECT | GO:0019882~antigen processing and presentation                                                       | 4,2E-7 | CD74, HLA-DMA, HLA-DRA, HLA-DRB1, HLA-DQB1 |
| GOTERM_BP_DIRECT | GO:0002503~peptide antigen assembly with MHC class II protein complex                                | 1,6E-6 | HLA-DMA, HLA-DRA, HLA-DRB1, HLA-DQB1       |
| GOTERM_BP_DIRECT | GO:0002504~antigen processing and presentation of peptide or polysaccharide antigen via MHC class II | 2,7E-6 | HLA-DMA, HLA-DRA, HLA-DRB1, HLA-DQB1       |
| GOTERM_BP_DIRECT | GO:0050870~positive regulation of T cell activation                                                  | 1,4E-5 | HLA-DMA, HLA-DRA, HLA-DRB1, HLA-DQB1       |
| GOTERM_BP_DIRECT | GO:0050778~positive regulation of immune response                                                    | 1,8E-5 | HLA-DMA, HLA-DRA, HLA-DRB1, HLA-DQB1       |

|                  |                                                                                 |        |                                                         |
|------------------|---------------------------------------------------------------------------------|--------|---------------------------------------------------------|
| GOTERM_BP_DIRECT | GO:0006955~immune response                                                      | 5,8E-5 | CD74, HLA-DMA, RGS1, HLA-DRA, THBS1, HLA-DRB1, HLA-DQB1 |
| GOTERM_BP_DIRECT | GO:0002250~adaptive immune response                                             | 2,5E-2 | HLA-DMA, HLA-DRA, HLA-DRB1, HLA-DQB1                    |
| GOTERM_CC_DIRECT | GO:0042613~MHC class II protein complex                                         | 3,4E-8 | CD74, HLA-DMA, HLA-DRA, HLA-DRB1, HLA-DQB1              |
| GOTERM_CC_DIRECT | GO:0071556~integral component of luminal side of endoplasmic reticulum membrane | 7,1E-6 | CD74, HLA-DRA, HLA-DRB1, HLA-DQB1                       |
| GOTERM_CC_DIRECT | GO:0098553~luminal side of endoplasmic reticulum membrane                       | 7,1E-6 | CD74, HLA-DRA, HLA-DRB1, HLA-DQB1                       |
| GOTERM_CC_DIRECT | GO:0030658~transport vesicle membrane                                           | 2,4E-5 | CD74, HLA-DRA, HLA-DRB1, HLA-DQB1                       |
| GOTERM_CC_DIRECT | GO:0012507~ER to Golgi transport vesicle membrane                               | 5,6E-5 | CD74, HLA-DRA, HLA-DRB1, HLA-DQB1                       |
| GOTERM_CC_DIRECT | GO:0030669~clathrin-coated endocytic vesicle membrane                           | 1,0E-4 | CD74, HLA-DRA, HLA-DRB1, HLA-DQB1                       |
| GOTERM_CC_DIRECT | GO:0030666~endocytic vesicle membrane                                           | 1,2E-4 | CD74, HLA-DRA, HLA-DRB1, HLA-DQB1                       |
| GOTERM_CC_DIRECT | GO:0032588~trans-Golgi network membrane                                         | 3,6E-4 | CD74, HLA-DRA, HLA-DRB1, HLA-DQB1                       |
| GOTERM_CC_DIRECT | GO:0031902~late endosome membrane                                               | 1,0E-3 | HLA-DMA, HLA-DRA, HLA-DRB1, HLA-DQB1                    |

|                  |                                                 |        |                                                   |
|------------------|-------------------------------------------------|--------|---------------------------------------------------|
| GOTERM_CC_DIRECT | GO:0009986~cell surface                         | 1,4E-3 | CD74, HLA-DMA, HLA-DRA, THBS1, HLA-DRB1, HLA-DQB1 |
| GOTERM_CC_DIRECT | GO:0005765~lysosomal membrane                   | 1,8E-3 | CD74, HLA-DMA, HLA-DRA, HLA-DRB1, HLA-DQB1        |
| GOTERM_CC_DIRECT | GO:0010008~endosome membrane                    | 5,3E-3 | HLA-DMA, HLA-DRA, HLA-DRB1, HLA-DQB1              |
| GOTERM_CC_DIRECT | GO:0070062~extracellular exosome                | 2,2E-2 | CD74, HLA-DMA, HLA-DRA, HLA-DRB1, HLA-DQB1        |
| GOTERM_MF_DIRECT | GO:0023026~MHC class II protein complex binding | 5,6E-8 | CD74, HLA-DMA, HLA-DRA, HLA-DRB1, HLA-DQB1        |
| GOTERM_MF_DIRECT | GO:0032395~MHC class II receptor activity       | 6,5E-7 | HLA-DMA, HLA-DRA, HLA-DRB1, HLA-DQB1              |
| GOTERM_MF_DIRECT | GO:0042605~peptide antigen binding              | 3,8E-5 | HLA-DMA, HLA-DRA, HLA-DRB1, HLA-DQB1              |
