# Supplementary material for: A Pilot Analysis of Whole Transcriptome of Human Cryopreserved Sperm
Source: MDPI journal article supplement (doi:10.3390/ijms25074131), 2024-04-08
Supplement: s1 [file s1]

**Table S2.** List of transcripts more abundant in cryopreserved sperm in comparison with non-cryopreserved sperm.

|          |         |          |          |         |
|----------|---------|----------|----------|---------|
| ALKBH5   | ALOX15B | AMD1     | ARHGEF15 | BBS5    |
| CD74     | CXCL2   | CYP2B6   | FOSB     | HLA-DMA |
| HLA-DQB1 | HLA-DRA | HLA-DRB1 | ILDR1    | MAMLD1  |
| MYO1C    | NEFH    | PLAAT5   | RASD1    | RGS1    |
| RPL10    | RPS17   | S100A4   | SNAI1    | TCF15   |
| THBS1    | TLE1    | ZG16B    |          |         |
