# Supplementary material for: A Pilot Analysis of Whole Transcriptome of Human Cryopreserved Sperm
Source: MDPI journal article supplement (doi:10.3390/ijms25074131), 2024-04-08
Supplement: s1 [file s1]

**Table S3.** The most significantly ( $P < 0.05$ ) enriched Gene Ontology Biological Process (BP), cellular components (CC) and molecular function (MF) terms in transcripts decreased in cryopreserved sperm respect to non-cryopreserved sperm.

| Category         | Term                                                     | P-Value  | Genes                                                                                                             |
|------------------|----------------------------------------------------------|----------|-------------------------------------------------------------------------------------------------------------------|
| GOTERM_BP_DIRECT | GO:0007283~spermatogenesis                               | 2,40E-05 | HERPUD2, SPATA6L, ODF2, LIMK2, C9ORF24, MEA1, CABS1, SPATA6, OAZ3, SPATA32, TBC1D21, PROK2, TXNDC2, CCIN, SPATA19 |
| GOTERM_BP_DIRECT | GO:0030154~cell differentiation                          | 1,30E-02 | HEMGN, KRTDAP, CPNE9, ODF2, SYAP1, C9ORF24, GLRX2, MEA1, SPATA6, TXNDC2, TCF4, CCIN, SPATA19                      |
| GOTERM_BP_DIRECT | GO:0030036~actin cytoskeleton organization               | 4,60E-03 | CAP1, CAPZB, CAPZA3, LIMK2, CCIN, PHACTR1, NF2                                                                    |
| GOTERM_BP_DIRECT | GO:0000209~protein polyubiquitination                    | 1,20E-03 | PSMA6, MARCHF8, TRIP12, UBE2DNL                                                                                   |
| GOTERM_BP_DIRECT | GO:0007017~microtubule-based process                     | 2,40E-03 | DYNLL2, DNAL4, TUBA4A, TUBA8                                                                                      |
| GOTERM_BP_DIRECT | GO:0006511~ubiquitin-dependent protein catabolic process | 2,90E-03 | PSMA6, TRIP12, RNF133, UBQLN3                                                                                     |
| GOTERM_BP_DIRECT | GO:0007339~binding of sperm to zona pellucida            | 4,50E-03 | HSPA1L, PRKAR2A, PRSS37                                                                                           |

|                  |                                                                  |          |                              |
|------------------|------------------------------------------------------------------|----------|------------------------------|
| GOTERM_BP_DIRECT | GO:0007338~single fertilization                                  | 2,30E-02 | ACTL7A, TUBGCP3, AKAP4       |
| GOTERM_BP_DIRECT | GO:0030317~flagellated sperm motility                            | 4,60E-02 | TBC1D21, SPEM1, AKAP4, CABS1 |
| GOTERM_BP_DIRECT | GO:0007286~spermatid development                                 | 4,70E-02 | BRIP1, ODF2, IQCG, TUBA8     |
| GOTERM_BP_DIRECT | GO:0008544~epidermis development                                 | 4,50E-03 | KRTDAP, IFT172, SPRR2D       |
| GOTERM_BP_DIRECT | GO:0044782~cilium organization                                   | 1,80E-02 | ODF2, FAM161B, IQCG          |
| GOTERM_BP_DIRECT | GO:0007507~heart development                                     | 2,60E-02 | POPDC3, MICAL2, TNNT3        |
| GOTERM_BP_DIRECT | GO:0050772~positive regulation of axonogenesis                   | 2,80E-02 | TIAM2, NRDC, ROBO1           |
| GOTERM_BP_DIRECT | GO:0031032~actomyosin structure organization                     | 3,10E-02 | CNN1, EPB41L2, PHACTR1       |
| GOTERM_BP_DIRECT | GO:0006281~DNA repair                                            | 3,60E-02 | BRIP1, TRIP12, ERCC6         |
| GOTERM_BP_DIRECT | GO:0051225~spindle assembly                                      | 5,20E-02 | NCOR1, TUBGCP3, MAPRE3       |
| GOTERM_BP_DIRECT | GO:0051085~chaperone mediated protein folding requiring cofactor | 3,50E-02 | HSPA1L, BAG1                 |
| GOTERM_BP_DIRECT | GO:0000077~DNA damage checkpoint                                 | 3,70E-02 | BRIP1, ERCC6                 |
| GOTERM_BP_DIRECT | GO:0001707~mesoderm formation                                    | 3,90E-02 | GPI, NF2                     |
| GOTERM_BP_DIRECT | GO:0006816~calcium ion transport                                 | 4,90E-02 | PLCZ1, SELENOK               |

|                  |                                                               |          |                                                                                                             |
|------------------|---------------------------------------------------------------|----------|-------------------------------------------------------------------------------------------------------------|
| GOTERM_BP_DIRECT | GO:0030968~endoplasmic reticulum<br>unfolded protein response | 5,10E-02 | HERPUD2, SERP2                                                                                              |
| GOTERM_CC_DIRECT | GO:0097224~sperm connecting piece                             | 1,10E-04 | SPATA6L, CAPZB, AKAP4, SPATA6                                                                               |
| GOTERM_CC_DIRECT | GO:0005856~cytoskeleton                                       | 7,60E-04 | DYRK4, ACTL7A, AKAP4, DYNLL2, TUBA4A, CNN1,<br>CAPZB, SGCA, TBC1D21, EPB41L2, NF2, ACTRT2,<br>SAXO1, ACTRT1 |
| GOTERM_CC_DIRECT | GO:0005743~mitochondrial inner<br>membrane                    | 1,60E-03 | DUSP21, CHCHD3, CABS1, SPATA19                                                                              |
| GOTERM_CC_DIRECT | GO:0001669~acrosomal vesicle                                  | 4,50E-03 | TBC1D21, ACTL7A, PRSS37, IQCF1, CABS1, TUBA8                                                                |
| GOTERM_CC_DIRECT | GO:0005929~cilium                                             | 6,90E-03 | CEP295NL, ODF2, TTLL2, IFT172, FAM161B, DYNLL2,<br>DNAL4, MLF1                                              |
| GOTERM_CC_DIRECT | GO:0015630~microtubule cytoskeleton                           | 7,90E-03 | TEX35, MAPRE3, KIF2B, FAM161B, LYST, TUBA4A,<br>TUBA8                                                       |
| GOTERM_CC_DIRECT | GO:0005874~microtubule                                        | 9,50E-03 | ODF2, KIF5A, CEP170, TUBGCP3, KIF2B, DYNLL2,<br>DNAL4, TUBA4A, TUBA8                                        |
| GOTERM_CC_DIRECT | GO:0097225~sperm midpiece                                     | 1,00E-02 | TBC1D21, IFT172, AKAP4, SPATA19                                                                             |

|                  |                                            |          |                                                                                                                                                                                                                                                                                                                                                                                                                                                                                   |
|------------------|--------------------------------------------|----------|-----------------------------------------------------------------------------------------------------------------------------------------------------------------------------------------------------------------------------------------------------------------------------------------------------------------------------------------------------------------------------------------------------------------------------------------------------------------------------------|
| GOTERM_CC_DIRECT | GO:0048471~perinuclear region of cytoplasm | 1,60E-02 | ZDHHC20, STX8, LIMK2, SYAP1, C9ORF24, SLC5A1, AKAP4, MLF1, PLCZ1, SPATA32, KLHL7, KIF5A, MAPRE3, NF2                                                                                                                                                                                                                                                                                                                                                                              |
| GOTERM_CC_DIRECT | GO:0005737~cytoplasm                       | 2,00E-02 | DYRK4, CLPB, SYAP1, MEA1, DCAF6, ROBO1, RO60, HENMT1, SGCA, CYP2R1, KIF5A, PHACTR1, BANF2, CAST, CAP1, CDV3, SERPINB4, LYPLA1, MLF1, TUBA4A, IQCG, EEF1G, PSMA6, ANO1, DUSP21, LGALS13, MAPRE3, BPI, EXOC5, KIF2B, FAM20A, SPEM1, ACTRT2, KIZ, ACTRT1, ACTL7A, ITPR3, CST8, AKAP4, OAZ3, BRIP1, CLMN, PRKAR2A, BAG1, EEF2KMT, MARCHF8, DNAJB8, TXNDC2, RNF133, SPRR2D, HSPA1L, ODF2, KCNIP2, LIMK2, ALYREF, PRSS37, MICAL2, LSM2, UCK2, PDCL2, TUBGCP3, NF2, SERGEF, DNAL4, TUBA8 |
| GOTERM_CC_DIRECT | GO:0031514~motile cilium                   | 2,20E-02 | ACTL7A, AKAP4, SAXO1, CABS1, IQCG                                                                                                                                                                                                                                                                                                                                                                                                                                                 |
| GOTERM_CC_DIRECT | GO:0042995~cell projection                 | 2,50E-02 | ANO1, EGFLAM, ODF2, NF2, KIZ, CAMP                                                                                                                                                                                                                                                                                                                                                                                                                                                |
| GOTERM_CC_DIRECT | GO:0036126~sperm flagellum                 | 2,80E-02 | ODF2, SAXO1, SPATA19, IQCG                                                                                                                                                                                                                                                                                                                                                                                                                                                        |

|                  |                                  |          |                                                                                                                                                                                                                                                                                                                                                                                                                                                                                |
|------------------|----------------------------------|----------|--------------------------------------------------------------------------------------------------------------------------------------------------------------------------------------------------------------------------------------------------------------------------------------------------------------------------------------------------------------------------------------------------------------------------------------------------------------------------------|
| GOTERM_CC_DIRECT | GO:0005813~centrosome            | 3,10E-02 | CEP295NL, ODF2, LIMK2, PRKAR2A, CEP170, TUBGCP3, KIF2B, ENTR1, KIZ, DYNLL2, TTC39A                                                                                                                                                                                                                                                                                                                                                                                             |
| GOTERM_CC_DIRECT | GO:0097228~sperm principal piece | 3,60E-02 | IFT172, AKAP4, CABS1                                                                                                                                                                                                                                                                                                                                                                                                                                                           |
| GOTERM_MF_DIRECT | GO:0005509~calcium ion binding   | 2,90E-06 | PLCZ1, KCNIP2, AMY1C, PKD2L1, ITPR3, ANKEF1, CABS1                                                                                                                                                                                                                                                                                                                                                                                                                             |
| GOTERM_MF_DIRECT | GO:0003779~actin binding         | 3,90E-04 | CAP1, CNN1, CAPZB, CAPZA3, SPATA32, TBC1D21, CLMN, EPB41L2, MICAL2, TNNT3, PHACTR1, NF2                                                                                                                                                                                                                                                                                                                                                                                        |
| GOTERM_MF_DIRECT | GO:0005515~protein binding       | 3,60E-03 | CLPB, TTL10, SPPL2C, C2ORF88, SYAP1, TNC, PKD2L1, RORA, DCAF6, CHCHD3, HENMT1, KIF5A, PROK2, FAM81B, CAST, TLE4, STX8, TEX55, GTPBP2, IQCF2, LEMD1, TUBA4A, PCP2, TBC1D21, LGALS13, RUBCNL, SPIN2B, FAM161B, FREM1, ACTL7A, KLHL11, ITPR3, SLC5A1, OAZ3, CNN1, BRIP1, KCNV2, PRKAR2A, EPB41L2, BAG1, TXNDC2, SMYD3, HMOX2, AKIRIN1, ODF2, ALYREF, NRDC, FBXO39, MICAL2, RAB27B, ANKEF1, LSM2, H1-7, TCF4, TUBGCP3, NF2, SERGEF, DNAL4, TUBA8, HRK, HERPUD2, GPI, DYRK4, WFDC9, |

|                  |                                                                      |          |                                                                                                                                                                                                                                                                                                                                                                                                                                                                                                                         |
|------------------|----------------------------------------------------------------------|----------|-------------------------------------------------------------------------------------------------------------------------------------------------------------------------------------------------------------------------------------------------------------------------------------------------------------------------------------------------------------------------------------------------------------------------------------------------------------------------------------------------------------------------|
|                  |                                                                      |          | CCDC121, CBY2, MEA1, USE1, LYST, HMGB4, ASGR1, ROBO1, SERP2, C1QTNF3, UBL3, SPTLC1, SGCA, CAPZB, AKAP14, GSG1, SPIN1, CCIN, CEP170, PHACTR1, NELFE, CAP1, TMCO5A, LYPLA1, DCC, C9ORF24, GLRX2, DYNLL2, ANO2, MLF1, EEF1G, PSMA6, ANO1, NCOR1, DUSP21, MAPRE3, EXOC5, FAM20A, SAXO1, KIZ, HEMGN, ATL3, FGL1, WDR20, SELENOK, AKAP4, ZNRF3, PGRMC2, EGFLAM, MARCHF8, EEF2KMT, TNNI3, ENTR1, CCDC185, TRIM42, RIBC1, UBQLN3, CDRT4, MPP3, HSPA1L, KCNIP2, LIMK2, SAMD4A, AGT, CMSS1, SPATA32, POLR3C, KLHL7, TRIP12, ERCC6 |
| GOTERM_MF_DIRECT | GO:0005227~calcium activated cation channel activity                 | 9,50E-03 | ANO1, PKD2L1                                                                                                                                                                                                                                                                                                                                                                                                                                                                                                            |
| GOTERM_MF_DIRECT | GO:0005229~intracellular calcium activated chloride channel activity | 1,10E-02 | ANO1, ANO2                                                                                                                                                                                                                                                                                                                                                                                                                                                                                                              |

|                  |                                                                        |          |                                   |
|------------------|------------------------------------------------------------------------|----------|-----------------------------------|
| GOTERM_MF_DIRECT | GO:0004867~serine-type endopeptidase inhibitor activity                | 1,90E-02 | WFDC11, WFDC9, SERPINB4, PI3, AGT |
| GOTERM_MF_DIRECT | GO:0008574~ATP-dependent microtubule motor activity, plus-end-directed | 2,60E-02 | KIF5A, DYNLL2, DNAL4              |
| GOTERM_MF_DIRECT | GO:0031625~ubiquitin protein ligase binding                            | 4,10E-02 | HSPA1L, STX8, BAG1                |
| GOTERM_MF_DIRECT | GO:0005254~chloride channel activity                                   | 4,20E-02 | ANO1, ANO2                        |
| GOTERM_MF_DIRECT | GO:0005262~calcium channel activity                                    | 4,40E-02 | PKD2L1, ITPR3                     |
| GOTERM_MF_DIRECT | GO:0061630~ubiquitin protein ligase activity                           | 4,90E-02 | MARCHF8, TRIP12, RNF133           |
| GOTERM_MF_DIRECT | GO:0044183~protein binding involved in protein folding                 | 5,20E-02 | HSPA1L, DNAJB8                    |
